# Supplementary material
Source: MDPI journal article supplement (https://www.mdpi.com/2073-4395/11/12/2569)
Supplement: s1 [file s1]

# Supplementary Material

**Table S1.** Split averages of tree size variables of Valencia sweet orange grafted onto four rootstocks and cultivated at three tree densities. Gavião Peixoto-SP, Brazil, 2020.

| Tree Density<br>(Trees·ha <sup>-1</sup> ) | Rootstock  | THb              | DPb              | DRb     | CVb                                   | RVb                                 | THa              | DPa              | DRa     | CVa                                   | RVa                                 |
|-------------------------------------------|------------|------------------|------------------|---------|---------------------------------------|-------------------------------------|------------------|------------------|---------|---------------------------------------|-------------------------------------|
|                                           |            | ----- (cm) ----- | ----- (cm) ----- |         | (m <sup>3</sup> ·tree <sup>-1</sup> ) | (m <sup>3</sup> ·ha <sup>-1</sup> ) | ----- (cm) ----- | ----- (cm) ----- |         | (m <sup>3</sup> ·tree <sup>-1</sup> ) | (m <sup>3</sup> ·ha <sup>-1</sup> ) |
| 513                                       | IAC 1697   | 274.54           | 297.86           | 359.50  | 15.53                                 | 7,966.55                            | 272.04           | 297.86           | 352.61  | 15.08                                 | 7,731.40                            |
|                                           | IAC 1710   | 381.25           | 328.04           | 457.50  | 30.28                                 | 15,527.19                           | 351.11           | 328.04           | 429.43  | 25.98                                 | 13,324.85                           |
|                                           | Swingle    | 371.39           | 314.75           | 429.50  | 26.41                                 | 13,544.24                           | 337.86           | 314.75           | 410.71  | 22.93                                 | 11,759.76                           |
|                                           | Swingle 4x | 274.82           | 284.71           | 305.36  | 13.29                                 | 6,816.59                            | 270.89           | 284.71           | 301.71  | 12.88                                 | 6,603.56                            |
| 696                                       | IAC 1697   | 286.50           | 262.29           | 366.21  | 14.50                                 | 10,087.78                           | 286.50           | 262.29           | 352.64  | 13.96                                 | 9,712.35                            |
|                                           | IAC 1710   | 395.25           | 296.71           | 453.46  | 27.81                                 | 19,349.11                           | 359.29           | 291.96           | 403.21  | 22.24                                 | 15,468.91                           |
|                                           | Swingle    | 371.21           | 274.79           | 412.96  | 22.15                                 | 15,411.33                           | 344.29           | 274.79           | 381.71  | 18.96                                 | 13,190.19                           |
|                                           | Swingle 4x | 274.89           | 254.64           | 308.64  | 11.59                                 | 8,065.50                            | 271.32           | 255.61           | 307.25  | 11.36                                 | 7,902.82                            |
| 1000                                      | IAC 1697   | 284.79           | 236.04           | 346.39  | 12.33                                 | 12,329.12                           | 279.21           | 236.04           | 308.93  | 10.70                                 | 10,697.13                           |
|                                           | IAC 1710   | 396.61           | 248.71           | 443.75  | 22.84                                 | 22,844.06                           | 365.36           | 249.14           | 357.50  | 17.01                                 | 17,007.15                           |
|                                           | Swingle    | 376.98           | 243.57           | 390.27  | 18.72                                 | 18,717.36                           | 354.29           | 243.57           | 338.45  | 15.26                                 | 15,259.70                           |
|                                           | Swingle 4x | 270.04           | 203.36           | 296.43  | 8.64                                  | 8,644.94                            | 269.50           | 203.36           | 277.79  | 8.05                                  | 8,052.87                            |
| <i>p</i> -values                          |            |                  |                  |         |                                       |                                     |                  |                  |         |                                       |                                     |
| Density (D)                               |            | 0.3934           | <0.0001          | 0.0082  | <0.0001                               | <0.0001                             | 0.1982           | <0.0001          | <0.0001 | <0.0001                               | <0.0001                             |
| Rootstock (R)                             |            | <0.0001          | <0.0001          | <0.0001 | <0.0001                               | <0.0001                             | <0.0001          | <0.0001          | <0.0001 | <0.0001                               | <0.0001                             |
| D x R                                     |            | 0.8463           | 0.7920           | 0.7458  | 0.4023                                | 0.0485                              | 0.7177           | 0.7622           | 0.0093  | 0.1622                                | 0.5149                              |
| CV% (D)                                   |            | 6.02             | 10.49            | 5.20    | 15.67                                 | 16.11                               | 5.99             | 9.69             | 7.03    | 12.68                                 | 11.86                               |
| CV% (R)                                   |            | 6.04             | 8.78             | 6.82    | 16.03                                 | 15.34                               | 5.53             | 8.20             | 5.21    | 14.84                                 | 13.80                               |

TH = tree height; DP = canopy equatorial diameter parallel to the row line; DR = canopy equatorial diameter perpendicularly to the row line; CV = canopy volume of tree; RV = row volume estimated as the total canopy volume per hectare bases; (b) and (a) = before and after pruning at 8.5 years of age, respectively, in 2020. Swingle 4x = autotetraploid selection of the Swingle citrumelo.

**Table S2.** Split averages of production variables of Valencia sweet orange grafted onto four rootstocks and cultivated at three tree densities. Gavião Peixoto-SP, Brazil, 2014-2020.

| Tree Density<br>(Trees·ha <sup>-1</sup> ) | Rootstock     | FY2014                               | FY2015  | FY2016  | FY2017  | FY2018  | FY2019  | FY2020  | FY1420  | EB<br>(%) | ABI    |
|-------------------------------------------|---------------|--------------------------------------|---------|---------|---------|---------|---------|---------|---------|-----------|--------|
|                                           |               | ----- (kg tree <sup>-1</sup> ) ----- |         |         |         |         |         |         |         |           |        |
| 513                                       | IAC 1697      | 4.50                                 | 29.52   | 61.14   | 99.16   | 70.95   | 113.72  | 55.84   | 58.57   | 23.36     | 0.34   |
|                                           | IAC 1710      | 2.99                                 | 27.70   | 48.85   | 133.19  | 108.72  | 145.15  | 120.04  | 79.83   | 14.23     | 0.32   |
|                                           | Swingle       | 3.20                                 | 29.10   | 33.41   | 103.27  | 119.99  | 128.36  | 98.15   | 69.55   | 14.12     | 0.37   |
|                                           | Swingle 4x    | 2.09                                 | 13.62   | 13.24   | 49.15   | 32.69   | 68.72   | 54.21   | 30.85   | 13.75     | 0.36   |
| 696                                       | IAC 1697      | 2.95                                 | 29.02   | 51.43   | 89.95   | 62.74   | 95.61   | 52.85   | 51.07   | 23.56     | 0.33   |
|                                           | IAC 1710      | 3.02                                 | 27.11   | 44.01   | 116.56  | 100.39  | 130.51  | 83.88   | 66.64   | 16.04     | 0.32   |
|                                           | Swingle       | 3.21                                 | 20.56   | 29.65   | 82.82   | 63.90   | 107.64  | 75.89   | 49.97   | 15.38     | 0.38   |
|                                           | Swingle 4x    | 3.09                                 | 12.01   | 12.39   | 38.83   | 28.99   | 50.77   | 49.24   | 25.63   | 15.67     | 0.30   |
| 1000                                      | IAC 1697      | 3.37                                 | 25.69   | 41.95   | 73.40   | 42.76   | 66.14   | 29.43   | 38.58   | 26.51     | 0.35   |
|                                           | IAC 1710      | 2.85                                 | 24.93   | 34.75   | 87.07   | 67.93   | 110.90  | 64.19   | 52.46   | 17.03     | 0.34   |
|                                           | Swingle       | 2.40                                 | 21.03   | 26.49   | 74.02   | 57.35   | 84.95   | 53.23   | 42.86   | 16.81     | 0.32   |
|                                           | Swingle 4x    | 3.13                                 | 10.62   | 12.65   | 41.68   | 26.09   | 38.50   | 28.06   | 21.87   | 17.31     | 0.37   |
| <i>p</i> -values                          |               |                                      |         |         |         |         |         |         |         |           |        |
|                                           | Density (D)   | 0.7599                               | 0.0097  | <0.0001 | <0.0001 | 0.0066  | 0.0003  | <0.0001 | <0.0001 | 0.0031    | 0.8009 |
|                                           | Rootstock (R) | 0.3207                               | <0.0001 | <0.0001 | <0.0001 | <0.0001 | <0.0001 | <0.0001 | <0.0001 | <0.0001   | 0.2916 |
|                                           | D x R         | 0.3664                               | 0.2768  | 0.0040  | <0.0001 | 0.1108  | 0.9740  | 0.0189  | 0.0080  | 0.9345    | 0.0816 |
|                                           | CV% (D)       | 41.38                                | 19.82   | 12.98   | 12.54   | 50.01   | 12.90   | 28.59   | 18.75   | 14.57     | 16.27  |
|                                           | CV% (R)       | 50.62                                | 20.40   | 14.33   | 10.25   | 44.93   | 21.16   | 21.71   | 12.05   | 13.51     | 10.92  |

FY = annual fruit yield from 2014 to 2020; FY1420 = average fruit yield in the 2014-2020 period. EB = early-bearing percentage (FY2014-FY2016/FY2014-FY2020); ABI = alternate bearing index calculated according to [47]. Swingle 4x = autotetraploid selection of the Swingle citrumelo.

**Table S3.** Split averages of productivity variables of Valencia sweet orange grafted onto four rootstocks and cultivated at three tree densities. Gavião Peixoto-SP, Brazil, 2014-2020.

| Tree Density<br>(trees·ha <sup>-1</sup> ) | Rootstock  | FP2014 | FP015   | FP2016  | FP2017  | FP2018  | FP2019  | FP2020  | FP1420  | FPHLB  | D <sub>HLB</sub> |
|-------------------------------------------|------------|--------|---------|---------|---------|---------|---------|---------|---------|--------|------------------|
| ----- (t·ha <sup>-1</sup> ) -----         |            |        |         |         |         |         |         |         |         |        |                  |
| 513                                       | IAC 1697   | 2.31   | 15.14   | 31.36   | 50.77   | 36.38   | 58.32   | 28.64   | 210.18  | 189.54 | 0.90             |
|                                           | IAC 1710   | 1.54   | 14.20   | 25.05   | 68.19   | 55.75   | 74.44   | 61.56   | 286.46  | 250.58 | 0.88             |
|                                           | Swingle    | 1.64   | 14.92   | 17.13   | 52.87   | 61.53   | 65.82   | 50.33   | 249.58  | 233.18 | 0.93             |
|                                           | Swingle 4x | 1.07   | 6.99    | 6.79    | 25.17   | 16.76   | 35.24   | 27.80   | 110.69  | 100.15 | 0.90             |
| 696                                       | IAC 1697   | 2.05   | 20.19   | 35.77   | 62.51   | 43.65   | 66.51   | 36.76   | 248.63  | 222.82 | 0.90             |
|                                           | IAC 1710   | 2.10   | 18.86   | 30.62   | 81.01   | 69.84   | 90.79   | 58.35   | 324.45  | 268.77 | 0.84             |
|                                           | Swingle    | 2.23   | 14.30   | 20.62   | 57.56   | 44.45   | 74.88   | 52.79   | 243.26  | 217.20 | 0.90             |
|                                           | Swingle 4x | 2.15   | 8.35    | 8.62    | 26.99   | 20.17   | 35.32   | 34.25   | 124.76  | 113.83 | 0.92             |
| 1000                                      | IAC 1697   | 3.37   | 25.69   | 41.95   | 73.40   | 42.76   | 66.14   | 29.43   | 270.08  | 232.59 | 0.86             |
|                                           | IAC 1710   | 2.85   | 24.93   | 34.75   | 87.07   | 67.93   | 110.90  | 64.19   | 367.25  | 327.35 | 0.89             |
|                                           | Swingle    | 2.40   | 21.03   | 26.49   | 74.02   | 57.35   | 84.95   | 53.23   | 300.01  | 274.25 | 0.91             |
|                                           | Swingle 4x | 3.13   | 10.62   | 12.65   | 41.68   | 26.09   | 38.50   | 28.06   | 153.10  | 149.50 | 0.97             |
| <i>p</i> -values                          |            |        |         |         |         |         |         |         |         |        |                  |
| Density (D)                               |            | 0.0040 | <0.0001 | <0.0001 | <0.0001 | 0.4069  | 0.0111  | 0.6007  | 0.0040  | 0.0040 | 0.4812           |
| Rootstock (R)                             |            | 0.5182 | <0.0001 | <0.0001 | <0.0001 | <0.0001 | <0.0001 | <0.0001 | <0.0001 | <0.001 | 0.0013           |
| D x R                                     |            | 0.6576 | 0.0593  | 0.6891  | 0.1001  | 0.3110  | 0.2370  | 0.4978  | 0.1005  | 0.0519 | 0.0889           |
| CV% (D)                                   |            | 38.71  | 23.50   | 14.45   | 13.16   | 35.67   | 15.39   | 28.38   | 16.38   | 16.68  | 8.43             |
| CV% (R)                                   |            | 53.71  | 21.74   | 15.64   | 10.43   | 35.81   | 19.02   | 20.52   | 10.23   | 11.7   | 5.81             |

FP = annual fruit productivity from 2014 to 2020; FP1420 = cumulative fruit productivity in the 2014-2020 period. FPHLB = cumulative fruit productivity in the 2014-2020 period considering tree eradication by huanglongbing over the evaluated period; D<sub>HLB</sub> = relative cumulative fruit productivity due to tree eradication by huanglongbing over the evaluated period. Swingle 4x = autotetraploid selection of the Swingle citrumelo.

**Table S4.** Split averages of production efficiency and land use variables of Valencia sweet orange grafted onto four rootstocks and cultivated at three tree densities. Gavião Peixoto-SP, Brazil, 2014-2020.

| Tree Density<br>(Trees·ha <sup>-1</sup> ) | Rootstock  | AI      | PEV<br>(kg·m <sup>-3</sup> ·ha <sup>-1</sup> ) | PEA<br>(kg·m <sup>-2</sup> ·ha <sup>-1</sup> ) | PEC <sub>2020</sub><br>(kg·m <sup>-3</sup> ) | LU1420  | LU1720  |
|-------------------------------------------|------------|---------|------------------------------------------------|------------------------------------------------|----------------------------------------------|---------|---------|
| 513                                       | IAC 1697   | 0.43    | 26.77                                          | 49.03                                          | 3.63                                         | 0.94    | 1.25    |
|                                           | IAC 1710   | 0.61    | 18.71                                          | 47.74                                          | 3.97                                         | 1.28    | 1.94    |
|                                           | Swingle    | 0.54    | 18.73                                          | 46.31                                          | 3.77                                         | 1.12    | 1.69    |
|                                           | Swingle 4x | 0.35    | 16.70                                          | 31.44                                          | 4.27                                         | 0.50    | 0.75    |
| 696                                       | IAC 1697   | 0.52    | 24.81                                          | 47.44                                          | 3.65                                         | 1.11    | 1.49    |
|                                           | IAC 1710   | 0.73    | 16.95                                          | 44.75                                          | 3.01                                         | 1.45    | 2.17    |
|                                           | Swingle    | 0.62    | 15.80                                          | 39.42                                          | 3.39                                         | 1.09    | 1.65    |
|                                           | Swingle 4x | 0.43    | 16.42                                          | 30.21                                          | 4.54                                         | 0.56    | 0.84    |
| 1000                                      | IAC 1697   | 0.64    | 22.65                                          | 42.88                                          | 2.46                                         | 1.21    | 1.54    |
|                                           | IAC 1710   | 0.87    | 16.18                                          | 42.59                                          | 2.81                                         | 1.64    | 2.39    |
|                                           | Swingle    | 0.75    | 16.33                                          | 40.67                                          | 2.88                                         | 1.34    | 1.96    |
|                                           | Swingle 4x | 0.47    | 18.19                                          | 32.69                                          | 3.37                                         | 0.69    | 0.99    |
| p-values                                  |            |         |                                                |                                                |                                              |         |         |
| Density (D)                               |            | <0.0001 | 0.0330                                         | 0.0959                                         | 0.0012                                       | 0.0050  | 0.0018  |
| Rootstock (R)                             |            | <0.0001 | <0.0001                                        | <0.0001                                        | 0.0136                                       | <0.0001 | <0.0001 |
| D x R                                     |            | 0.2896  | 0.5228                                         | 0.5152                                         | 0.5748                                       | 0.1017  | 0.2506  |
| CV% (D)                                   |            | 12.01   | 13.61                                          | 15.76                                          | 23.14                                        | 16.50   | 15.87   |
| CV% (R)                                   |            | 12.60   | 18.99                                          | 15.04                                          | 25.90                                        | 10.25   | 12.00   |

AI = area index (total canopy projection area by hectare in 2020); PEV = estimated production efficiency considering the cumulative production in the 2014-2020 period and the row volume in 2020; PEA = estimated production efficiency considering the cumulative production in the 2014-2020 period and the area index in 2020; PEC<sub>2020</sub> = production efficiency of the tree canopy volume in 2020; LU = land use index, the relation between the observed fruit productivity and the reference fruit productivity according to [48]) in the 2014-2020 (total evaluation period) and 2017-2020 (stable production period), respectively. Swingle 4x = autotetraploid selection of the Swingle citrumelo.

**Table S5.** Split averages of fruit quality variables of Valencia sweet orange grafted onto four rootstocks and cultivated at three tree densities. Gavião Peixoto-SP, Brazil, 2017-2018.

| Tree<br>Density<br>(Trees ha <sup>-1</sup> ) | Rootstock  | 2017      |               |           |        |                                           |           |                                | 2018      |               |           |        |                                           |           |                                |
|----------------------------------------------|------------|-----------|---------------|-----------|--------|-------------------------------------------|-----------|--------------------------------|-----------|---------------|-----------|--------|-------------------------------------------|-----------|--------------------------------|
|                                              |            | FW<br>(g) | SS<br>(°Brix) | TA<br>(%) | MI     | TI<br>(kg <sup>B</sup> ox <sup>-1</sup> ) | JC<br>(%) | II<br>(Boxes t <sup>-1</sup> ) | FW<br>(g) | SS<br>(°Brix) | TA<br>(%) | MI     | TI<br>(kg <sup>B</sup> ox <sup>-1</sup> ) | JC<br>(%) | II<br>(Boxes t <sup>-1</sup> ) |
| 513                                          | IAC 1697   | 160.46    | 13.32         | 0.84      | 16.07  | 3.17                                      | 58.36     | 208.31                         | 215.26    | 11.80         | 0.82      | 14.37  | 2.47                                      | 51.37     | 267.27                         |
|                                              | IAC 1710   | 193.40    | 11.46         | 0.65      | 17.72  | 2.72                                      | 58.21     | 242.84                         | 243.40    | 10.43         | 0.72      | 14.45  | 2.08                                      | 48.97     | 317.11                         |
|                                              | Swingle    | 185.00    | 12.41         | 0.81      | 15.77  | 2.93                                      | 57.88     | 225.51                         | 258.62    | 10.88         | 0.91      | 12.20  | 2.12                                      | 47.62     | 315.13                         |
|                                              | Swingle 4x | 169.00    | 13.33         | 0.77      | 18.20  | 3.11                                      | 57.29     | 211.98                         | 250.25    | 10.88         | 0.81      | 13.54  | 2.04                                      | 45.93     | 324.96                         |
| 696                                          | IAC 1697   | 158.88    | 13.26         | 0.78      | 17.03  | 3.20                                      | 59.14     | 206.51                         | 217.56    | 11.85         | 0.93      | 12.85  | 2.43                                      | 50.28     | 271.85                         |
|                                              | IAC 1710   | 183.14    | 11.79         | 0.68      | 17.49  | 2.80                                      | 58.25     | 235.77                         | 231.45    | 10.75         | 0.78      | 14.03  | 2.11                                      | 48.14     | 313.79                         |
|                                              | Swingle    | 166.53    | 12.84         | 0.93      | 14.04  | 2.91                                      | 55.63     | 227.14                         | 243.57    | 10.93         | 0.86      | 12.75  | 2.11                                      | 47.47     | 312.58                         |
|                                              | Swingle 4x | 158.21    | 13.59         | 0.84      | 16.20  | 3.05                                      | 55.07     | 216.28                         | 227.72    | 11.40         | 0.90      | 13.11  | 2.06                                      | 44.32     | 321.42                         |
| 1000                                         | IAC 1697   | 159.83    | 13.34         | 0.80      | 16.74  | 3.25                                      | 59.79     | 202.97                         | 226.95    | 11.80         | 0.91      | 13.08  | 2.39                                      | 49.62     | 276.83                         |
|                                              | IAC 1710   | 185.07    | 11.76         | 0.69      | 17.12  | 2.85                                      | 59.37     | 232.57                         | 221.39    | 11.08         | 0.79      | 14.10  | 2.27                                      | 50.21     | 291.63                         |
|                                              | Swingle    | 183.30    | 12.56         | 0.79      | 16.08  | 3.01                                      | 58.82     | 219.17                         | 241.14    | 11.03         | 0.96      | 11.79  | 2.08                                      | 46.28     | 319.11                         |
|                                              | Swingle 4x | 150.33    | 13.90         | 0.85      | 16.77  | 3.18                                      | 56.01     | 208.08                         | 245.81    | 11.33         | 0.89      | 13.12  | 2.09                                      | 45.13     | 319.04                         |
| p-values                                     |            |           |               |           |        |                                           |           |                                |           |               |           |        |                                           |           |                                |
| Density (D)                                  |            | 0.0914    | 0.2097        | 0.4364    | 0.5373 | 0.0851                                    | 0.0602    | 0.1090                         | 0.3273    | 0.2560        | 0.2696    | 0.6841 | 0.8598                                    | 0.4797    | 0.8862                         |
| Rootstock (R)                                |            | <0.0001   | <0.0001       | 0.0022    | 0.0760 | <0.0001                                   | <0.0001   | <0.0001                        | 0.0101    | 0.0003        | 0.0130    | 0.0551 | <0.0001                                   | <0.0001   | 0.0001                         |
| D x R                                        |            | 0.5685    | 0.666         | 0.5361    | 0.6836 | 0.8311                                    | 0.0597    | 0.8074                         | 0.5345    | 0.8756        | 0.8059    | 0.9328 | 0.7700                                    | 0.6584    | 0.8162                         |
| CV% (D)                                      |            | 6.39      | 3.12          | 10.29     | 11.07  | 3.37                                      | 2.38      | 3.57                           | 8.82      | 4.44          | 12.84     | 15.16  | 7.78                                      | 4.36      | 8.54                           |
| CV% (R)                                      |            | 7.80      | 3.06          | 13.45     | 12.20  | 3.06                                      | 2.12      | 3.37                           | 8.29      | 4.83          | 12.59     | 12.35  | 7.75                                      | 4.24      | 7.97                           |

FW = fresh weight; SS = total soluble solids concentration in the juice; TA = titratable acidity of juice; MI = maturity index (SS/TA); TI = technological index (amount of SS per standard orange box of 40.8 kg); JC = juice content in the fruit; II = industrial index (number of standard orange boxes to produce one ton of Frozen and Concentrated Orange Juice – FCOJ at 66 °Brix). Swingle 4x = autotetraploid selection of the Swingle citrumelo.

**Table S6.** Split averages of fruit quality variables of Valencia sweet orange grafted onto four rootstocks and cultivated at three tree densities. Gavião Peixoto-SP, Brazil, 2019-2020.

| Tree<br>Density<br>(Trees ha <sup>-1</sup> ) | Rootstock  | 2019      |               |           |        |                               |           |                                | 2020      |               |           |        |                               |           |                                |
|----------------------------------------------|------------|-----------|---------------|-----------|--------|-------------------------------|-----------|--------------------------------|-----------|---------------|-----------|--------|-------------------------------|-----------|--------------------------------|
|                                              |            | FW<br>(g) | SS<br>(°Brix) | TA<br>(%) | MI     | TI<br>(kg Box <sup>-1</sup> ) | JC<br>(%) | II<br>(Boxes t <sup>-1</sup> ) | FW<br>(g) | SS<br>(°Brix) | TA<br>(%) | MI     | TI<br>(kg Box <sup>-1</sup> ) | JC<br>(%) | II<br>(Boxes t <sup>-1</sup> ) |
| 513                                          | IAC 1697   | 194.42    | 12.36         | 0.65      | 18.94  | 2.92                          | 57.94     | 226.01                         | 207.80    | 12.82         | 0.73      | 17.60  | 3.22                          | 61.44     | 206.09                         |
|                                              | IAC 1710   | 204.95    | 10.69         | 0.62      | 17.34  | 2.44                          | 56.00     | 270.41                         | 200.85    | 12.12         | 0.62      | 19.53  | 3.06                          | 61.81     | 216.54                         |
|                                              | Swingle    | 226.81    | 10.85         | 0.59      | 18.54  | 2.35                          | 53.13     | 281.11                         | 210.28    | 12.81         | 0.68      | 19.22  | 3.26                          | 62.32     | 203.10                         |
|                                              | Swingle 4x | 223.23    | 10.90         | 0.50      | 22.46  | 2.30                          | 51.75     | 287.66                         | 229.95    | 11.99         | 0.57      | 21.19  | 3.06                          | 62.39     | 217.86                         |
| 696                                          | IAC 1697   | 181.45    | 12.59         | 0.62      | 20.32  | 2.96                          | 57.57     | 223.44                         | 179.58    | 13.47         | 0.73      | 18.66  | 3.37                          | 61.29     | 196.02                         |
|                                              | IAC 1710   | 202.69    | 10.69         | 0.60      | 17.69  | 2.42                          | 55.44     | 273.61                         | 182.44    | 12.53         | 0.67      | 18.88  | 3.07                          | 60.13     | 216.51                         |
|                                              | Swingle    | 218.58    | 11.29         | 0.61      | 18.53  | 2.49                          | 54.14     | 265.20                         | 205.48    | 12.38         | 0.64      | 19.48  | 3.17                          | 62.69     | 209.48                         |
|                                              | Swingle 4x | 228.33    | 11.30         | 0.50      | 22.51  | 2.33                          | 50.60     | 283.05                         | 215.07    | 12.50         | 0.63      | 20.92  | 3.14                          | 61.57     | 211.04                         |
| 1000                                         | IAC 1697   | 173.62    | 12.65         | 0.59      | 21.60  | 2.95                          | 57.21     | 223.89                         | 181.01    | 13.26         | 0.78      | 17.25  | 3.25                          | 59.99     | 203.87                         |
|                                              | IAC 1710   | 190.38    | 10.69         | 0.62      | 17.32  | 2.43                          | 55.76     | 271.66                         | 189.69    | 12.02         | 0.67      | 18.03  | 3.05                          | 62.10     | 217.37                         |
|                                              | Swingle    | 191.21    | 11.42         | 0.60      | 19.01  | 2.58                          | 55.33     | 256.17                         | 192.85    | 12.66         | 0.68      | 18.72  | 3.17                          | 61.36     | 209.18                         |
|                                              | Swingle 4x | 214.50    | 11.92         | 0.59      | 20.09  | 2.59                          | 53.28     | 255.48                         | 209.36    | 12.82         | 0.73      | 18.29  | 3.11                          | 59.56     | 213.13                         |
| p-values                                     |            |           |               |           |        |                               |           |                                |           |               |           |        |                               |           |                                |
| Density (D)                                  |            | 0.0151    | 0.1016        | 0.7502    | 0.8529 | 0.0501                        | 0.0540    | 0.0488                         | 0.1557    | 0.6916        | 0.5500    | 0.3949 | 0.9173                        | 0.3950    | 0.9239                         |
| Rootstock (R)                                |            | <0.0001   | <0.0001       | 0.0013    | 0.0002 | <0.0001                       | <0.0001   | <0.0001                        | <0.0001   | 0.0123        | 0.0345    | 0.0671 | 0.0675                        | 0.5341    | 0.0826                         |
| D x R                                        |            | 0.4771    | 0.3575        | 0.0867    | 0.3126 | 0.2693                        | 0.5327    | 0.1992                         | 0.6294    | 0.5114        | 0.6651    | 0.8442 | 0.9436                        | 0.5396    | 0.9425                         |
| CV% (D)                                      |            | 4.64      | 3.44          | 9.64      | 9.71   | 3.53                          | 1.21      | 3.67                           | 12.89     | 7.88          | 24.02     | 15.92  | 10.27                         | 3.87      | 10.31                          |
| CV% (R)                                      |            | 5.75      | 3.15          | 7.13      | 8.56   | 4.72                          | 2.93      | 4.81                           | 6.99      | 5.38          | 13.28     | 10.56  | 6.51                          | 3.42      | 6.98                           |

FW = fresh weight; SS = total soluble solids concentration in the juice; TA = titratable acidity of juice; MI = maturity index (SS/TA); TI = technological index (amount of SS per standard orange box of 40.8 kg); JC = juice content in the fruit; II = industrial index (number of standard orange boxes to produce one ton of Frozen and Concentrated Orange Juice – FCOJ at 66 °Brix). Swingle 4x = autotetraploid selection of the Swingle citrumelo.

**Table S7.** Split averages of mean fruit quality and soluble solids yield variables of Valencia sweet orange grafted onto four rootstocks and cultivated at three tree densities. Gavião Peixoto-SP, Brazil, 2017-2020.

| Tree<br>Density<br>(Trees·ha <sup>-1</sup> ) | Rootstock  | Average values for 2017-2020 |               |           |        |                               |           |                                | Annual and Cumulative Soluble Solids Yield |         |                                   |         |           |
|----------------------------------------------|------------|------------------------------|---------------|-----------|--------|-------------------------------|-----------|--------------------------------|--------------------------------------------|---------|-----------------------------------|---------|-----------|
|                                              |            | FW<br>(g)                    | SS<br>(°Brix) | TA<br>(%) | MI     | TI<br>(kg·Box <sup>-1</sup> ) | JC<br>(%) | II<br>(Boxes·t <sup>-1</sup> ) | 2017                                       | 2018    | 2019<br>(kg SS·ha <sup>-1</sup> ) | 2020    | 2017-2020 |
| 513                                          | IAC 1697   | 195.39                       | 12.58         | 0.77      | 16.55  | 2.94                          | 57.16     | 227.59                         | 3,930                                      | 2,192   | 4,254                             | 2,107   | 12,112    |
|                                              | IAC 1710   | 211.70                       | 11.20         | 0.66      | 17.18  | 2.58                          | 56.15     | 261.83                         | 4,327                                      | 2,900   | 4,842                             | 4,062   | 15,798    |
|                                              | Swingle    | 219.99                       | 11.82         | 0.76      | 16.20  | 2.69                          | 55.42     | 254.16                         | 3,972                                      | 2,103   | 3,957                             | 4,283   | 14,335    |
|                                              | Swingle 4x | 217.88                       | 11.85         | 0.67      | 18.59  | 2.66                          | 54.60     | 258.29                         | 1,916                                      | 718     | 1,619                             | 2,194   | 6,438     |
| 696                                          | IAC 1697   | 184.84                       | 12.80         | 0.77      | 17.03  | 2.99                          | 57.06     | 224.52                         | 4,765                                      | 2,457   | 4,830                             | 3,222   | 14,910    |
|                                              | IAC 1710   | 199.69                       | 11.49         | 0.69      | 17.00  | 2.62                          | 55.58     | 258.33                         | 5,313                                      | 3,630   | 5,412                             | 4,563   | 18,678    |
|                                              | Swingle    | 207.37                       | 11.94         | 0.77      | 16.07  | 2.69                          | 55.04     | 252.06                         | 4,263                                      | 2,402   | 4,577                             | 3,809   | 14,793    |
|                                              | Swingle 4x | 206.10                       | 12.27         | 0.73      | 17.97  | 2.68                          | 53.15     | 255.65                         | 2,068                                      | 1,096   | 2,021                             | 3,014   | 8,161     |
| 1000                                         | IAC 1697   | 186.25                       | 12.77         | 0.78      | 16.78  | 2.96                          | 56.60     | 227.13                         | 5,674                                      | 2,516   | 4,666                             | 2,359   | 14,899    |
|                                              | IAC 1710   | 197.48                       | 11.46         | 0.70      | 16.53  | 2.67                          | 56.93     | 251.62                         | 5,661                                      | 3,880   | 6,687                             | 4,505   | 20,409    |
|                                              | Swingle    | 203.90                       | 11.95         | 0.77      | 16.15  | 2.73                          | 55.52     | 250.28                         | 5,158                                      | 2,661   | 5,910                             | 4,247   | 17,642    |
|                                              | Swingle 4x | 204.78                       | 12.56         | 0.78      | 16.81  | 2.76                          | 53.56     | 247.80                         | 3,072                                      | 1,195   | 2,246                             | 2,149   | 8,616     |
| p-values                                     |            |                              |               |           |        |                               |           |                                |                                            |         |                                   |         |           |
| Density (D)                                  |            | 0.0071                       | 0.0303        | 0.2749    | 0.5988 | 0.1983                        | 0.1969    | 0.1839                         | 0.0002                                     | 0.0241  | 0.0320                            | 0.4181  | 0.0003    |
| Rootstock (R)                                |            | <0.0001                      | <0.0001       | <0.0001   | 0.0001 | <0.0001                       | <0.0001   | <0.0001                        | <0.0001                                    | <0.0001 | <0.0001                           | <0.0001 | <0.0001   |
| D x R                                        |            | 0.9796                       | 0.6517        | 0.2961    | 0.1998 | 0.9213                        | 0.3285    | 0.9001                         | 0.3698                                     | 0.9439  | 0.5011                            | 0.0909  | 0.0963    |
| CV% (D)                                      |            | 4.02                         | 2.21          | 9.35      | 9.36   | 3.07                          | 1.57      | 3.31                           | 9.02                                       | 19.18   | 16.29                             | 29.55   | 7.05      |
| CV% (R)                                      |            | 3.62                         | 2.68          | 5.12      | 4.37   | 3.61                          | 1.64      | 3.79                           | 10.49                                      | 24.71   | 19.11                             | 16.34   | 8.27      |

FW = fresh weight; SS = total soluble solids concentration in the juice; TA = titratable acidity of juice; MI = maturity index (SS/TA); TI = technological index (amount of SS per standard orange box of 40.8 kg); JC = juice content in the fruit; II = industrial index (number of standard orange boxes to produce one ton of Frozen and Concentrated Orange Juice – FCOJ at 66 °Brix). Swingle 4x = autotetraploid selection of the Swingle citrumelo.
